# Supplementary material for: Development of fluorophoric [2]pseudorotaxanes and [2]rotaxane: selective sensing of Zn(ii)
Source: Royal Society of Chemistry journal article supplement (doi:10.1039/d2ob01210c), 2022-01-01
Supplement: d2ob01210c1.pdf [file d2ob01210c1.pdf]

## Supporting Information

# Development of fluorophoric [2]pseudorotaxanes and [2]rotaxane: Selective sensing of Zn(II)

Somnath Bej, Mandira Nandi and Pradyut Ghosh\*

School of Chemical Sciences, Indian Association for the Cultivation of Science, 2A & 2B  
Raja S. C. Mullick Road, Kolkata 700032, India. E-mail: [icpg@iacs.res.in](mailto:icpg@iacs.res.in)

---

## List of contents

|                                                                                                                                     |         |
|-------------------------------------------------------------------------------------------------------------------------------------|---------|
| ❖ Synthetic scheme of L1-L4 (Scheme 1S-Scheme 3S) .....                                                                             | S2-S3   |
| ❖ UV/Vis and Emission spectra of NaphMC (Figure 1S).....                                                                            | S3      |
| ❖ Characterization of compound A (Figure 2S- Figure 3S).....                                                                        | S4      |
| ❖ Characterization of L1 (Figure 4S- Figure 7S).....                                                                                | S5-S6   |
| ❖ Characterization of compound L2 (Figure 8S- Figure 10S).....                                                                      | S7-S8   |
| ❖ Characterization of L3 (Figure 11S- Figure 14S).....                                                                              | S8-S10  |
| ❖ Characterization of compound C (Figure 15S- Figure 16S).....                                                                      | S10-S11 |
| ❖ Characterization of L4 (Figure 17S- Figure 18S).....                                                                              | S11-S12 |
| ❖ Characteristic UV/Vis spectra of {NiPR1(ClO <sub>4</sub> ) <sub>2</sub> -NiPR4(ClO <sub>4</sub> ) <sub>2</sub> } (Figure 19S).... | S12     |
| ❖ PL spectra of {NiPR1(ClO <sub>4</sub> ) <sub>2</sub> -NiPR4(ClO <sub>4</sub> ) <sub>2</sub> } (Figure 20S- Figure 23S)....        | S12-S13 |
| ❖ ESI-MS spectrum of [NiRTX(ClO <sub>4</sub> ) <sub>2</sub> ] (Figure 24S).....                                                     | S14     |
| ❖ Stacked plot of <sup>1</sup> H NMR spectra (Figure 25S).....                                                                      | S14     |
| ❖ ESI-MS spectrum of [RTX] (Figure 26S).....                                                                                        | S15     |
| ❖ NMR spectrum of [NAPRTX] (Figure 27S- Figure 28S).....                                                                            | S15-S16 |
| ❖ UV and PL spectra of [NAPRTX] (Figure 29S- Figure 30S).....                                                                       | S16-S17 |
| ❖ Characterization of ConAx (Figure 31S- Figure 35S).....                                                                           | S17-S19 |
| ❖ Non-linear fitting plot from PL titration data (Figure 36S).....                                                                  | S20     |
| ❖ UV titration of NAPRTX with Zn(ClO <sub>4</sub> ) <sub>2</sub> in solvent mixture and Molar ratio plot. (Figure 37S). .....       | S20     |
| ❖ PL titration of NAPRTX with Zn(ClO <sub>4</sub> ) <sub>2</sub> in solvent mixture and Molar ratio plot (Figure 38S) .....         | S21     |

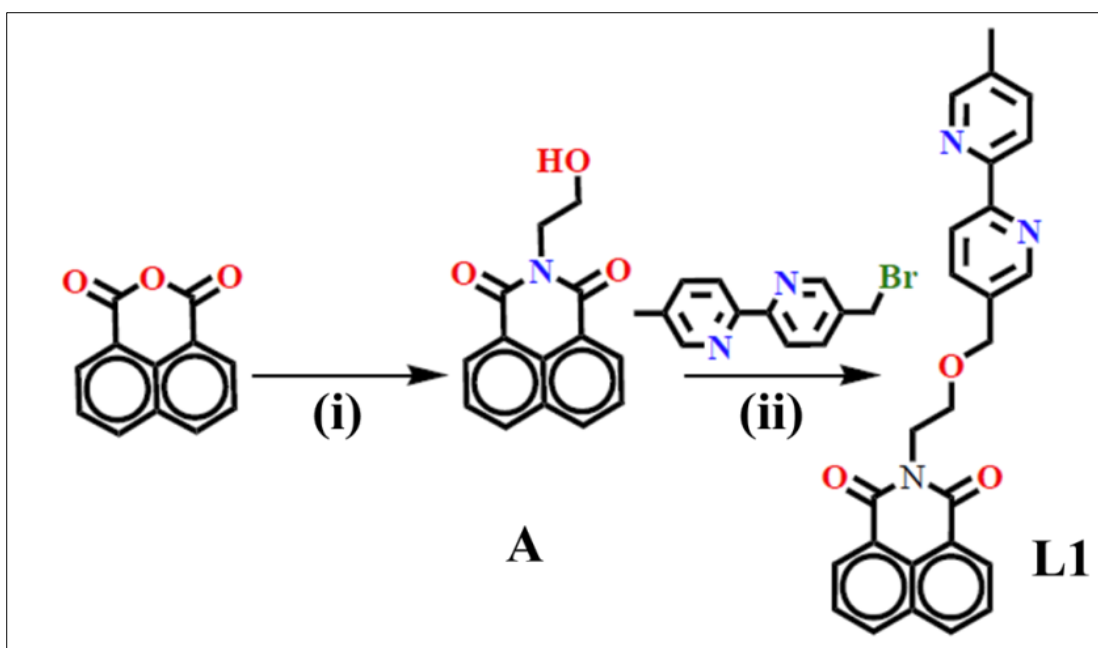

**Scheme 1S.** Synthetic path of **L1**: (i) 2-amino ethanol, CH<sub>3</sub>CH<sub>2</sub>OH, reflux, 14h; (ii) NaH, THF, stirring at 0 °C followed by stirring at RT for 12 h.

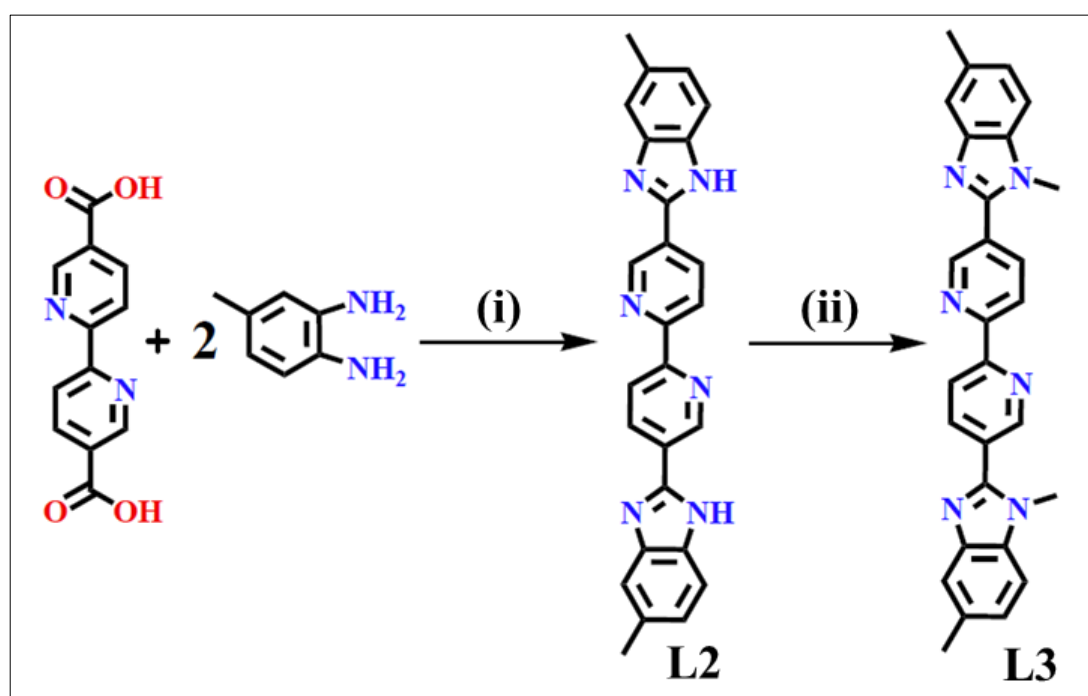

**Scheme 2S.** Synthetic path of **L2** and **L3**: (i) PPA, reflux, 18h; (ii) Methyl iodide, NaH, THF, stirring at 0°C followed by stirring at RT for 12 h.

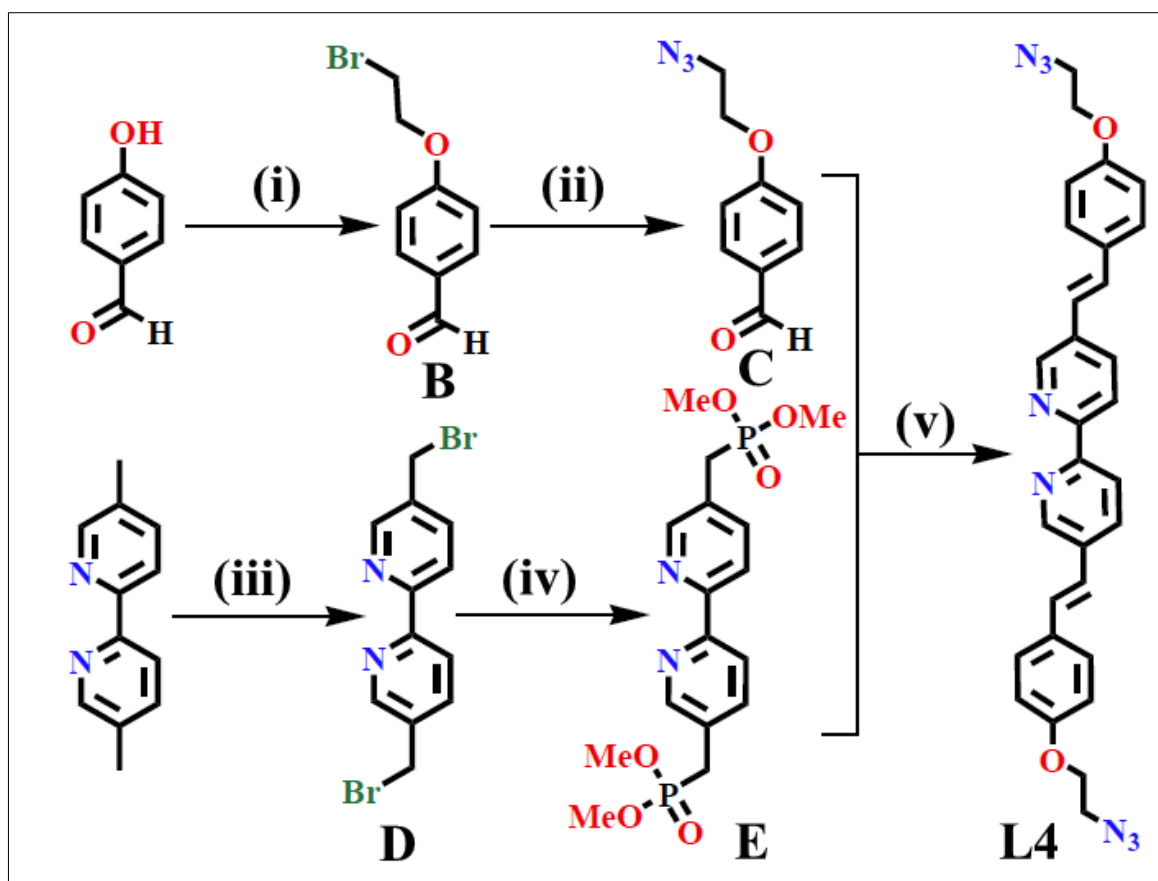

**Scheme 3S.** Synthetic path of L4: (i) 1,2-dibromo ethane,  $\text{CH}_3\text{CN}$ ,  $\text{K}_2\text{CO}_3$ , reflux; (ii)  $\text{NaN}_3$ , DMF, reflux, 8h; (iii) NBS, AIBN,  $\text{CCl}_4$ , reflux; (iv) trimethyl phosphite, reflux; (v) potassium tertbutoxide, DMF,  $0^\circ\text{C}$ , stirring, 10 h.

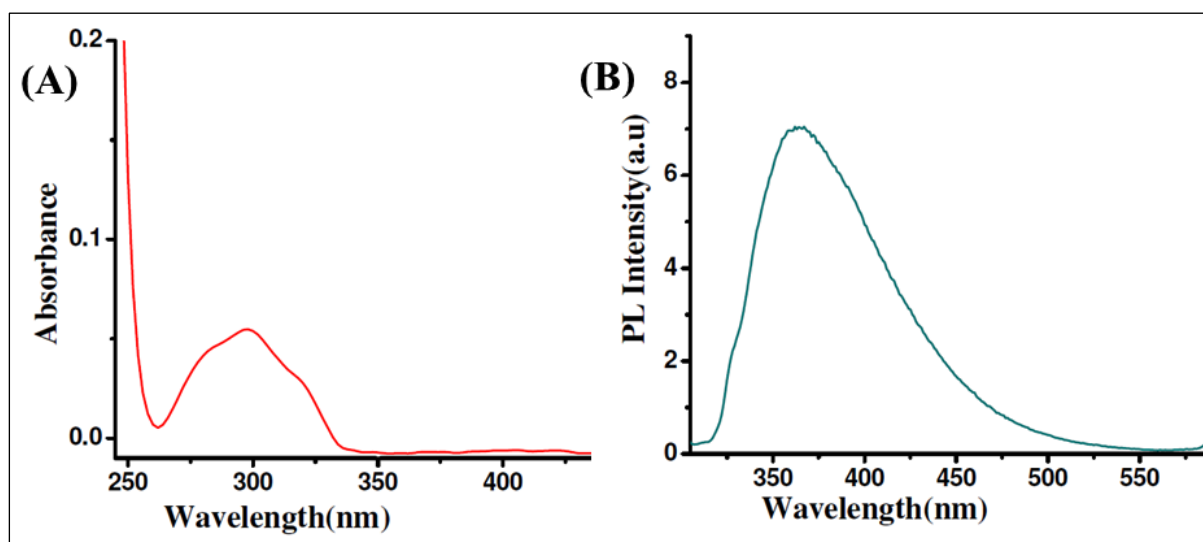

**Figure 1S.** (A) UV/Vis and (B) emission spectra of NaphMC at 298K.

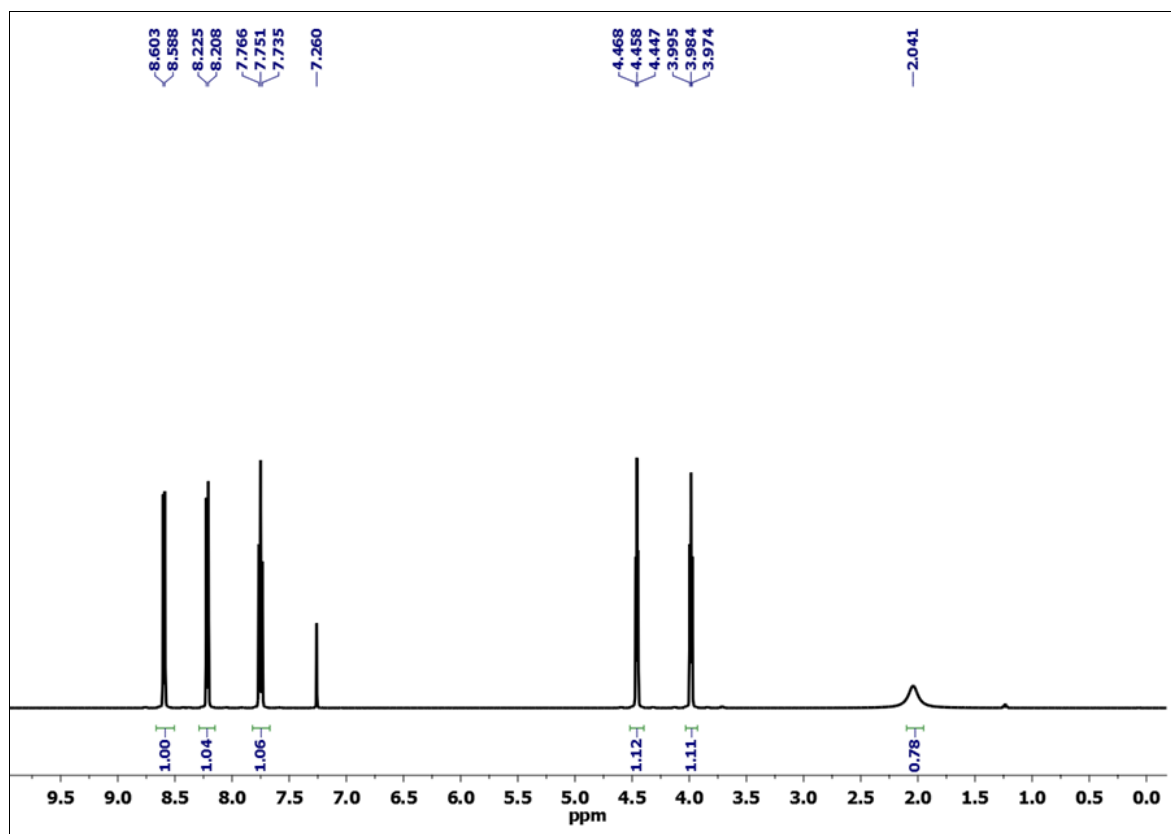

Figure 2S.  $^1\text{H}$ -NMR spectrum of A in  $\text{CDCl}_3$  in 500 MHz at 298K.

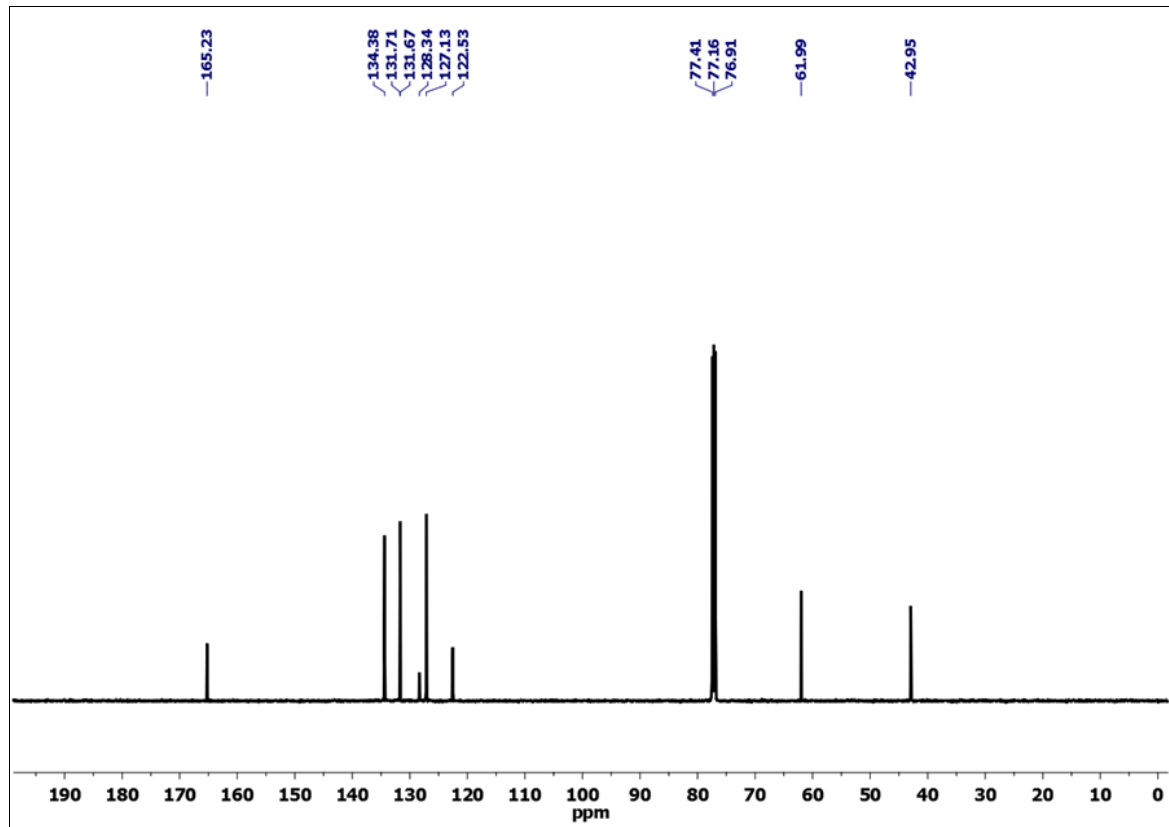

Figure 3S.  $^{13}\text{C}$ -NMR spectrum of A in  $\text{CDCl}_3$  in 125 MHz at 298K.

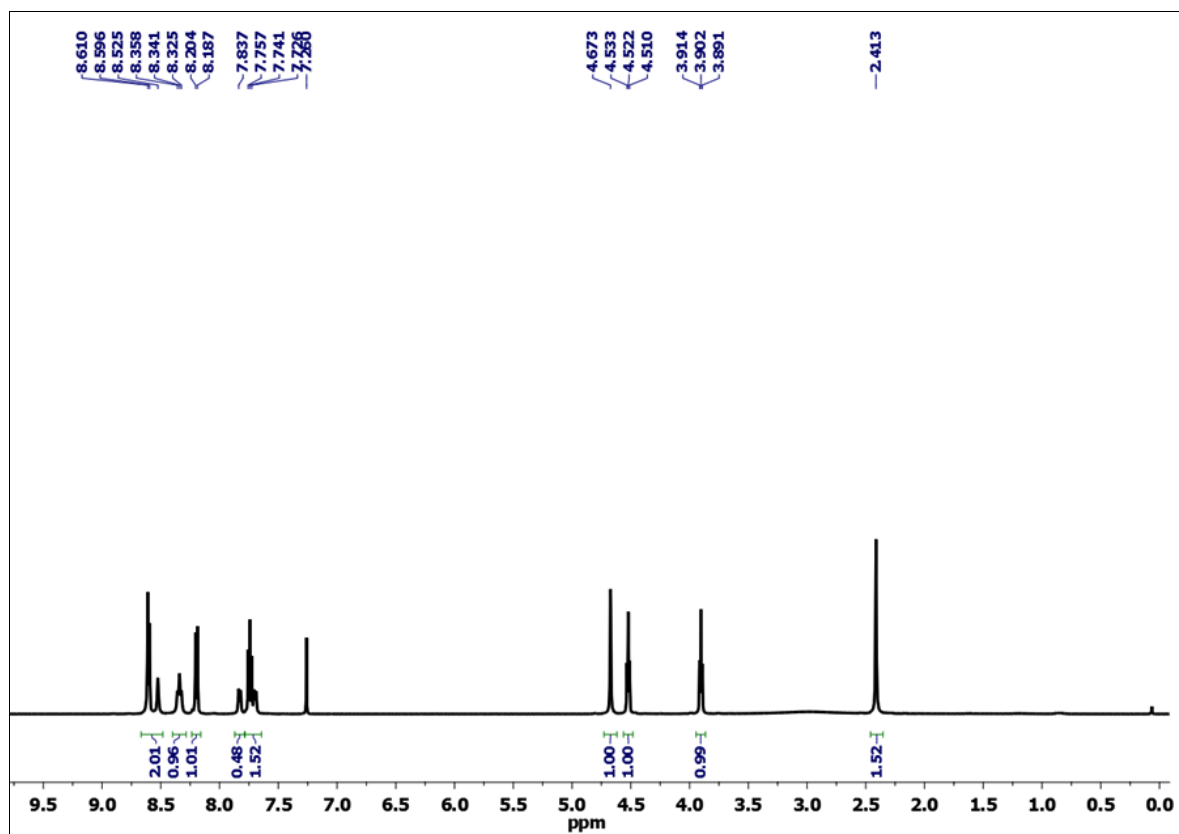

Figure 4S.  $^1\text{H}$ -NMR spectrum of **L1** in  $\text{CDCl}_3$  in 500 MHz at 298K.

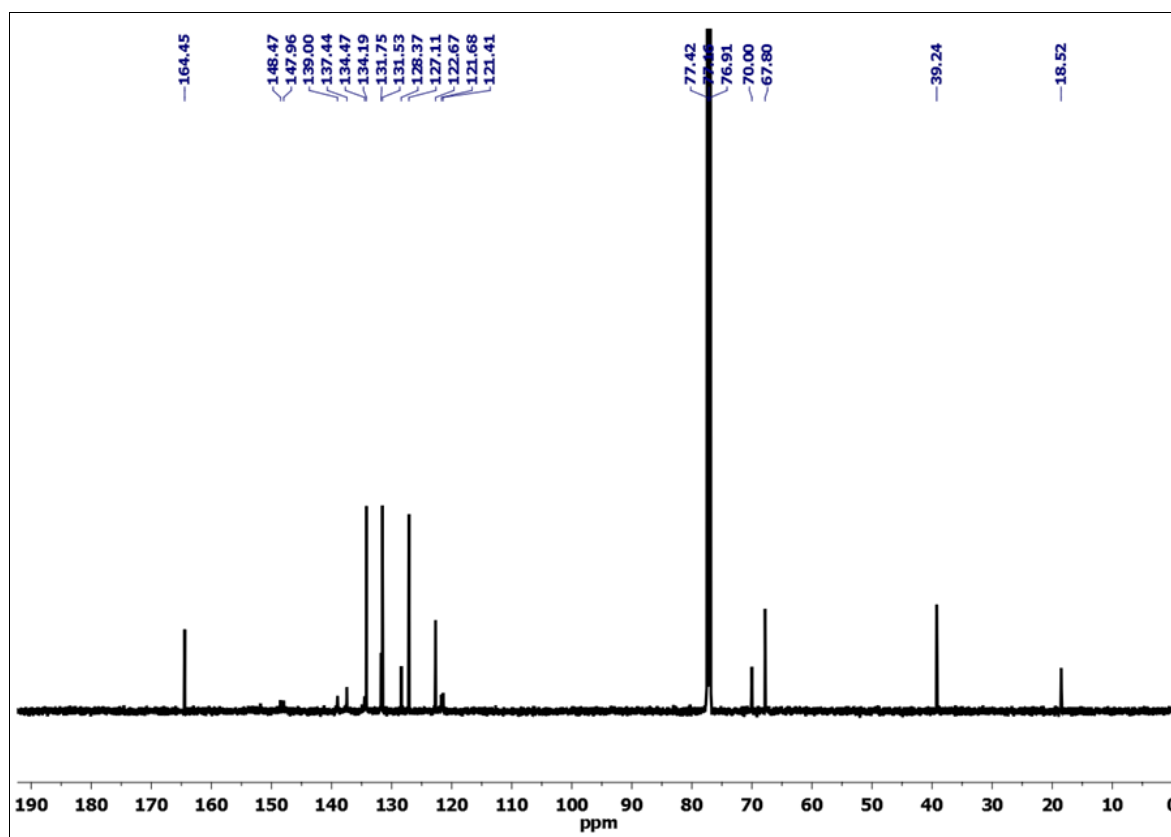

Figure 5S.  $^{13}\text{C}$ -NMR spectrum of **L1** in  $\text{CDCl}_3$  in 125 MHz at 298K.

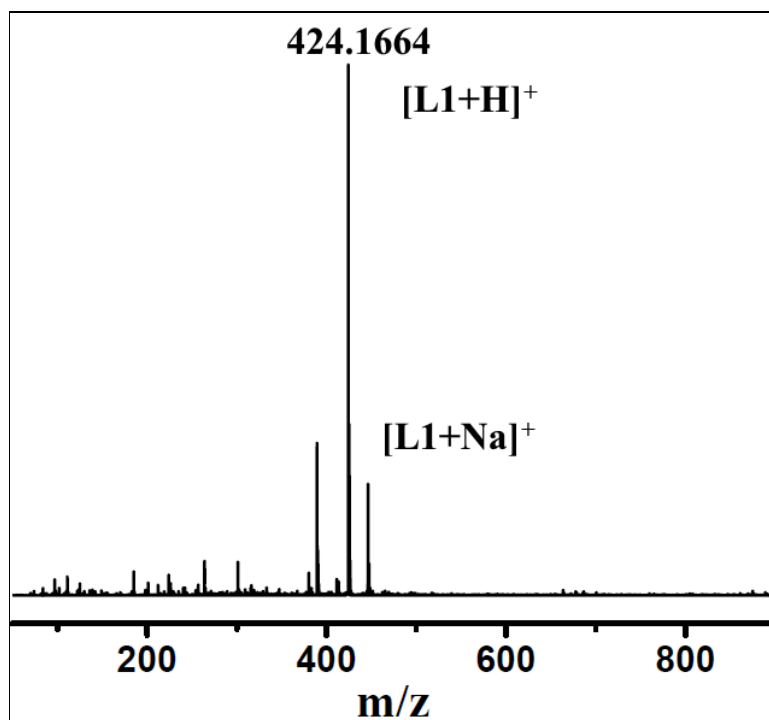

Figure 6S. ESI-MS (+ve) spectrum of L1 at 298K.

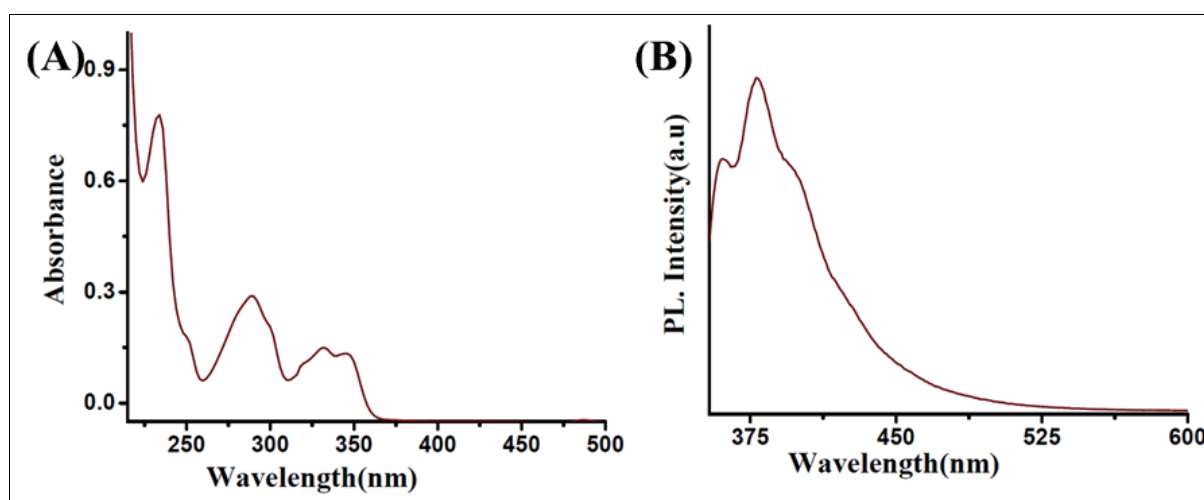

Figure 7S. (A) UV/Vis and (B) Emission spectra of L1 at 298K.

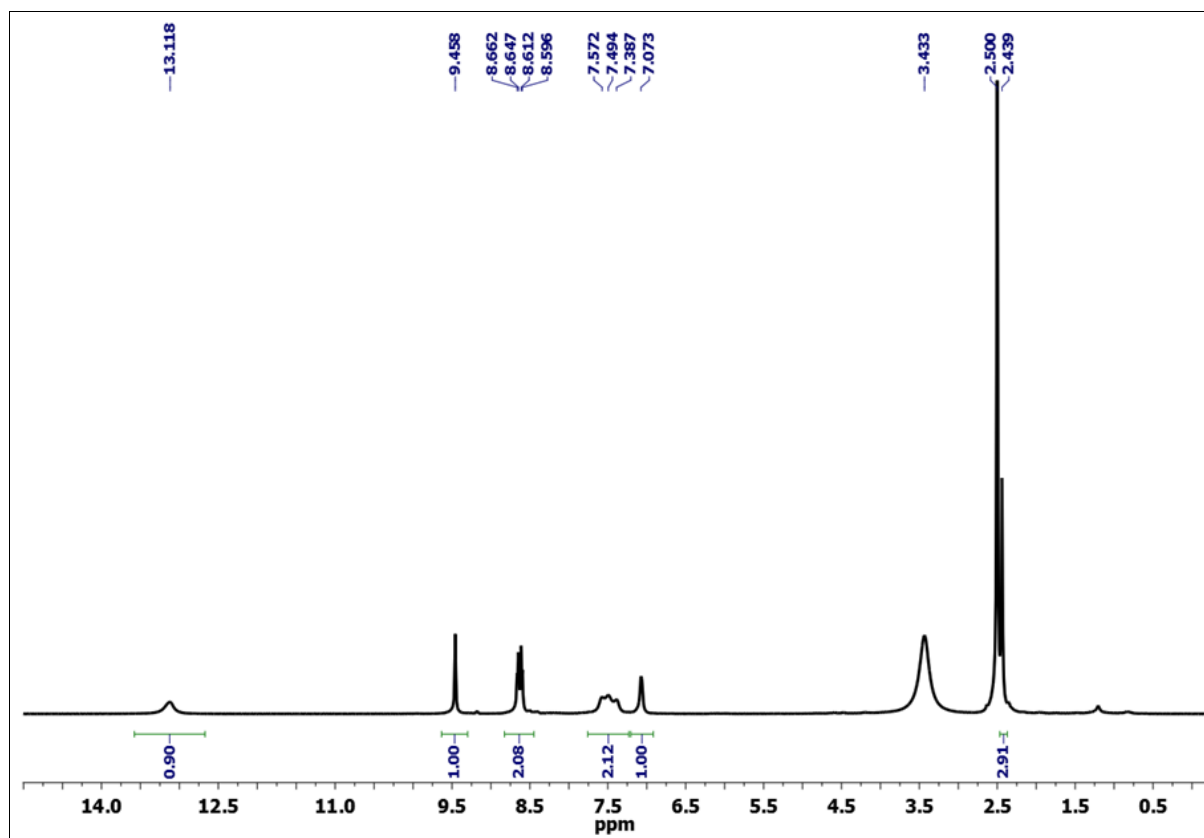

**Figure 8S.**  $^1\text{H-NMR}$  spectrum of **L2** in  $\text{DMSO-d}_6$  in 500 MHz at 298K.

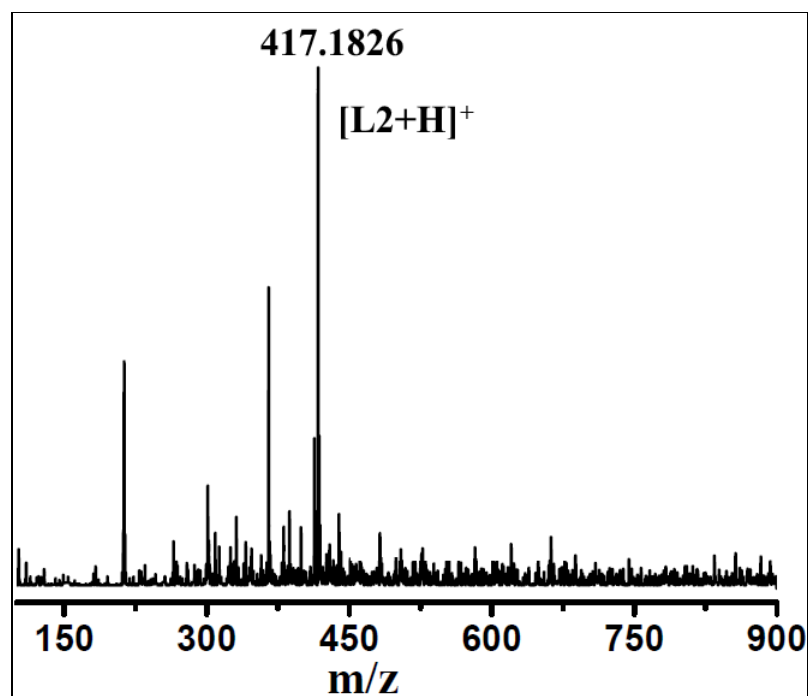

**Figure 9S.** ESI-MS (+ve) spectrum of **L2** at 298K.

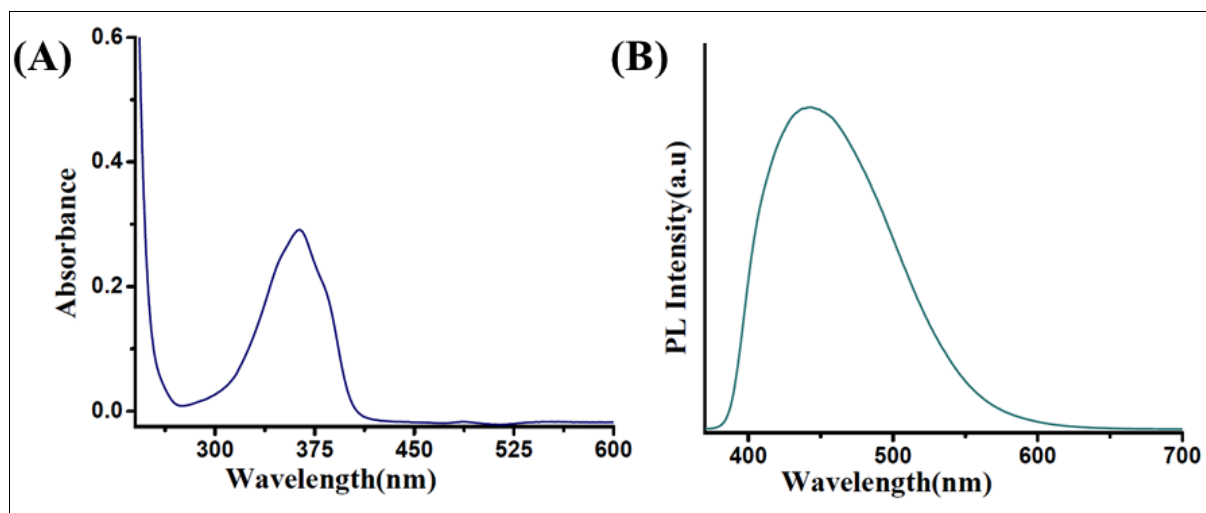

**Figure 10S.** (A) UV/Vis and (B) Emission spectra of **L2** ( $\lambda_{\text{exc}} = 363 \text{ nm}$ ) at 298K.

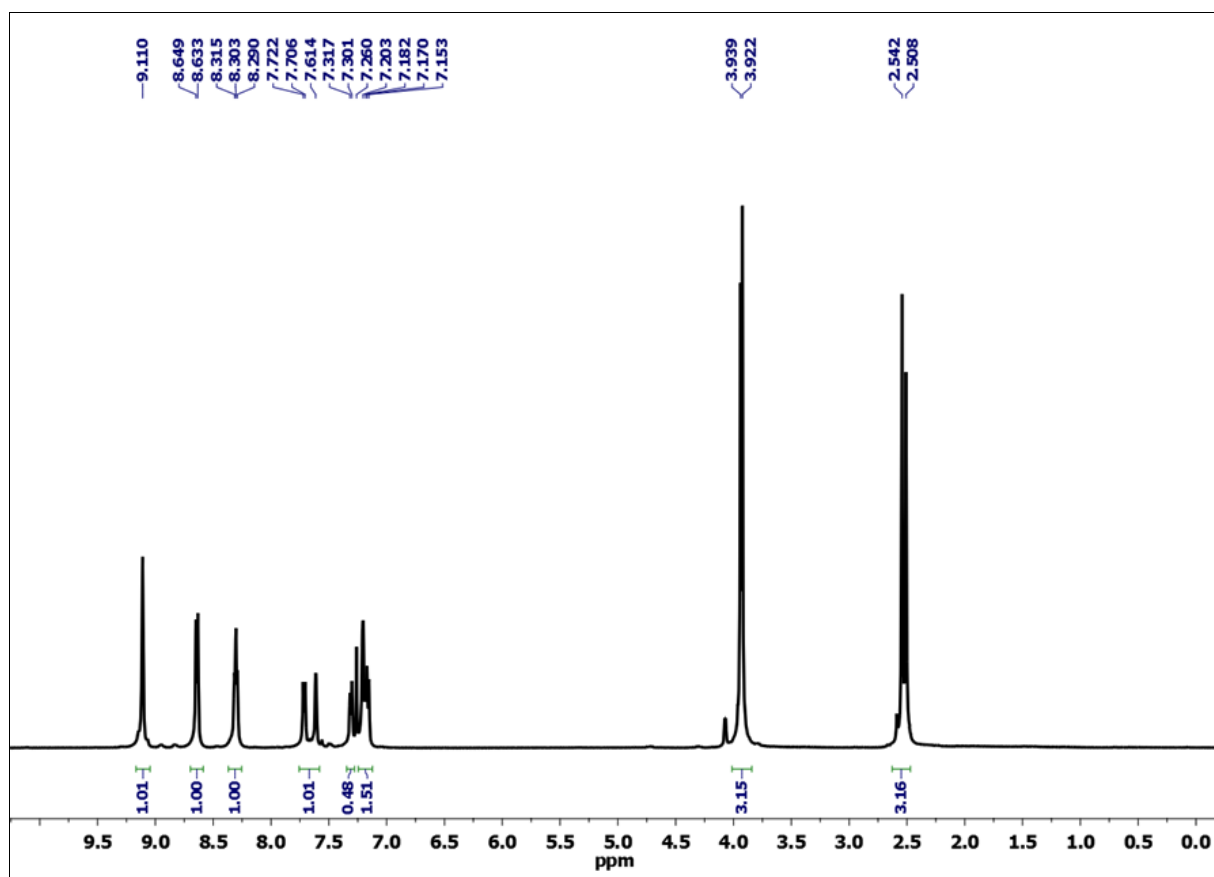

**Figure 11S.**  $^1\text{H-NMR}$  spectrum of **L3** in  $\text{CDCl}_3$  in 500 MHz at 298K.



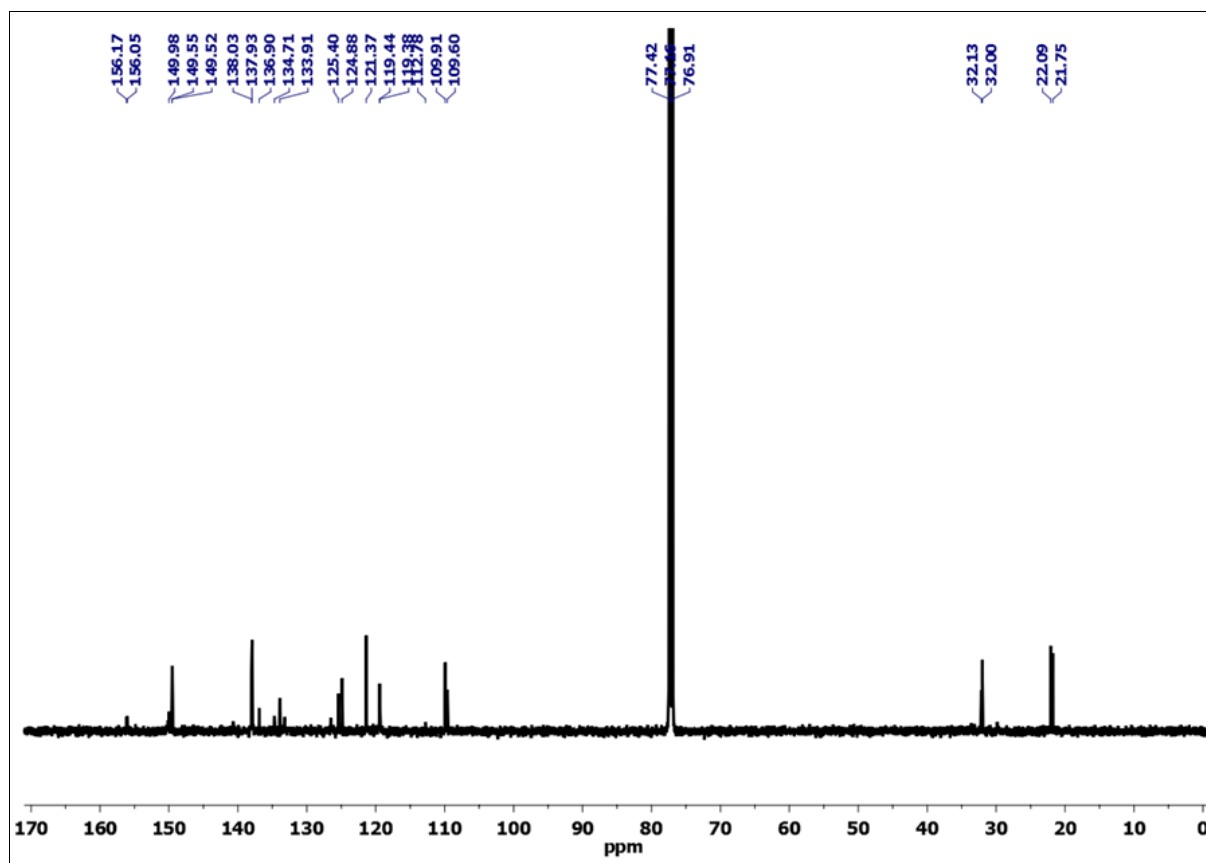

Figure 12S.  $^{13}\text{C}$ -NMR spectrum of L3 in  $\text{CDCl}_3$  in 500 MHz at 298K.

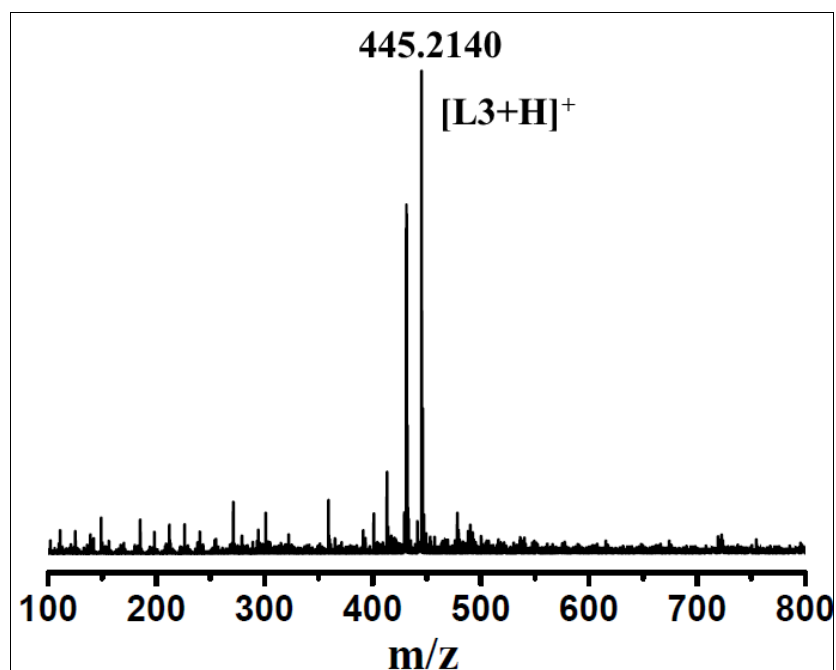

Figure 13S. ESI-MS (+ve) spectrum of L3 at 298K.

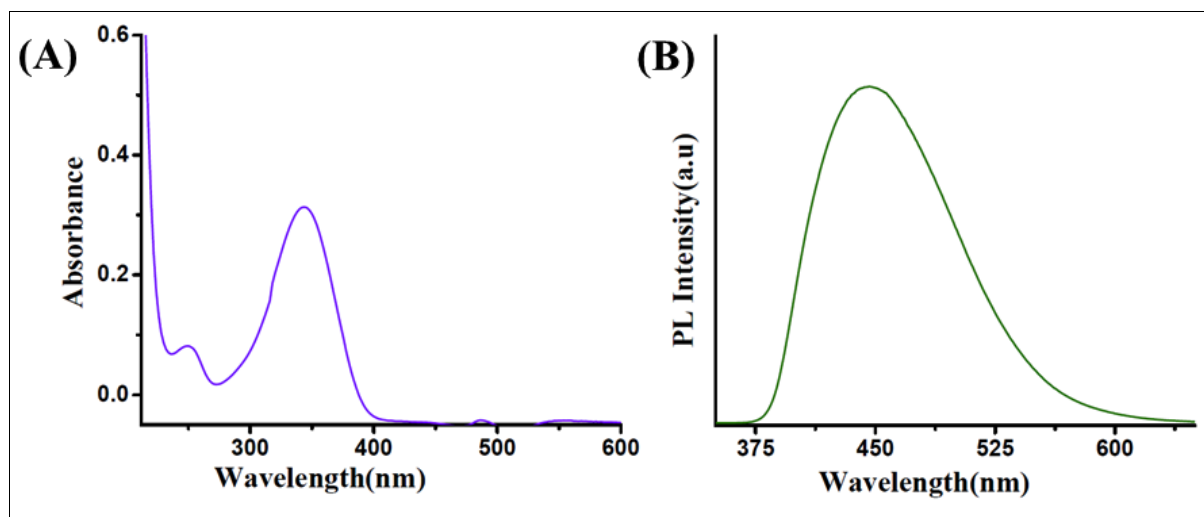

**Figure 14S.** (A) UV/Vis and (B) Emission spectra of **L3** ( $\lambda_{exc} = 345$  nm) at 298K.

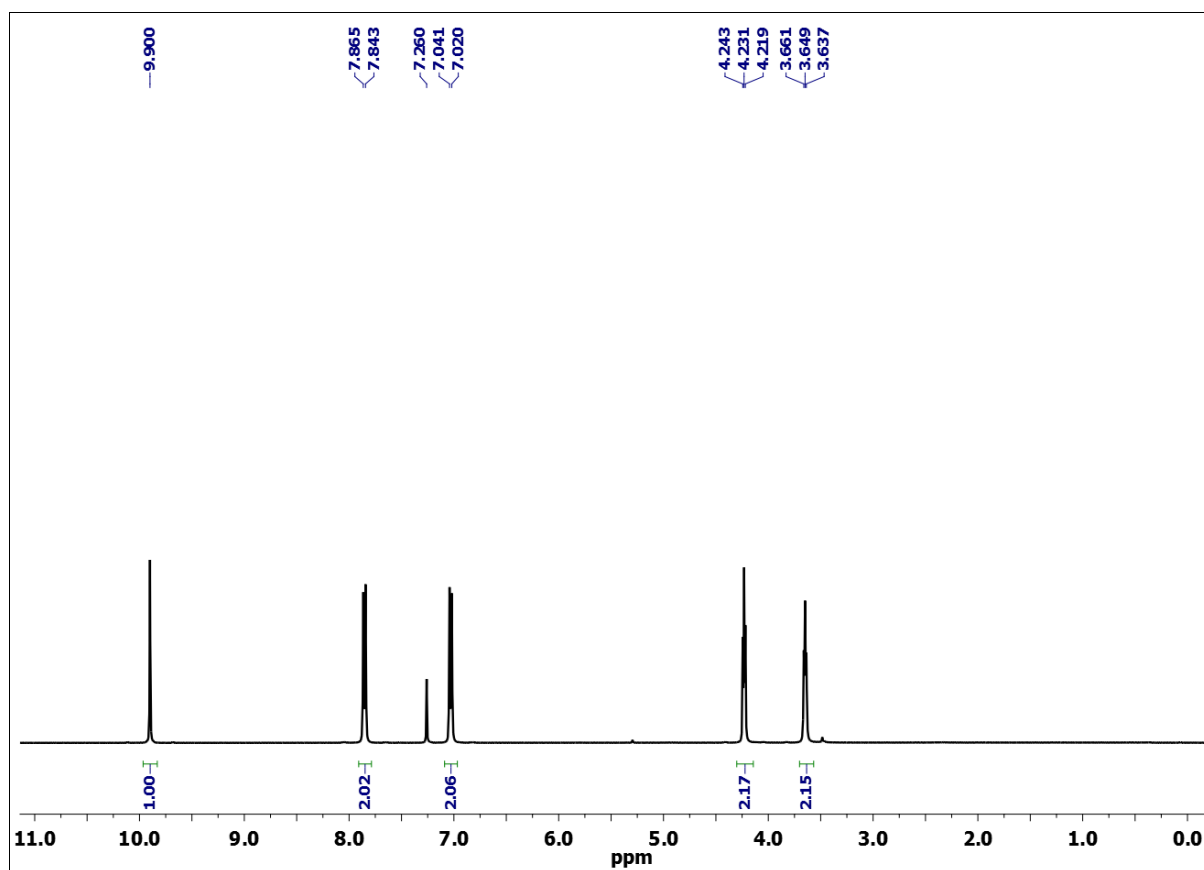

**Figure 15S.**  $^1\text{H-NMR}$  spectrum of compound **C** in  $\text{CDCl}_3$  in 400 MHz at 298K.

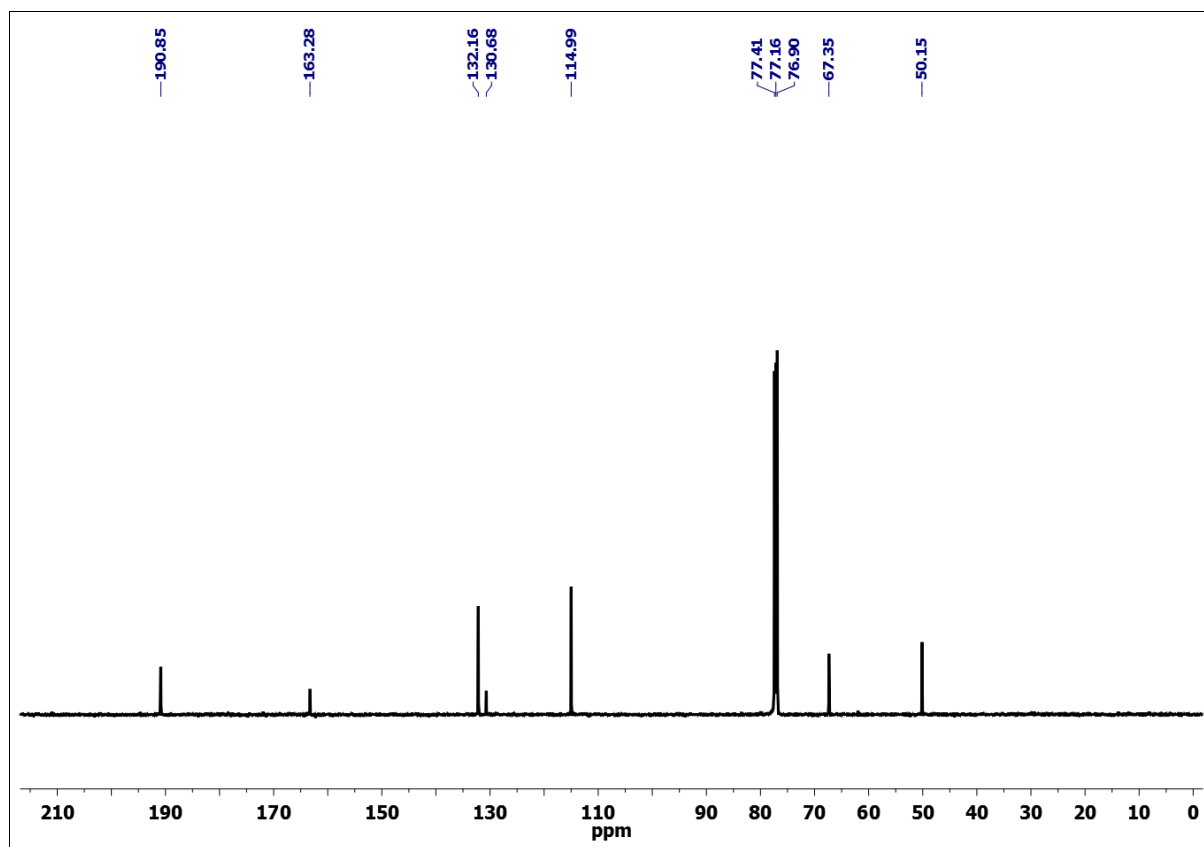

**Figure 16S.**  $^{13}\text{C}$ -NMR spectrum of compound **C** in  $\text{CDCl}_3$  in 125 MHz at 298K.

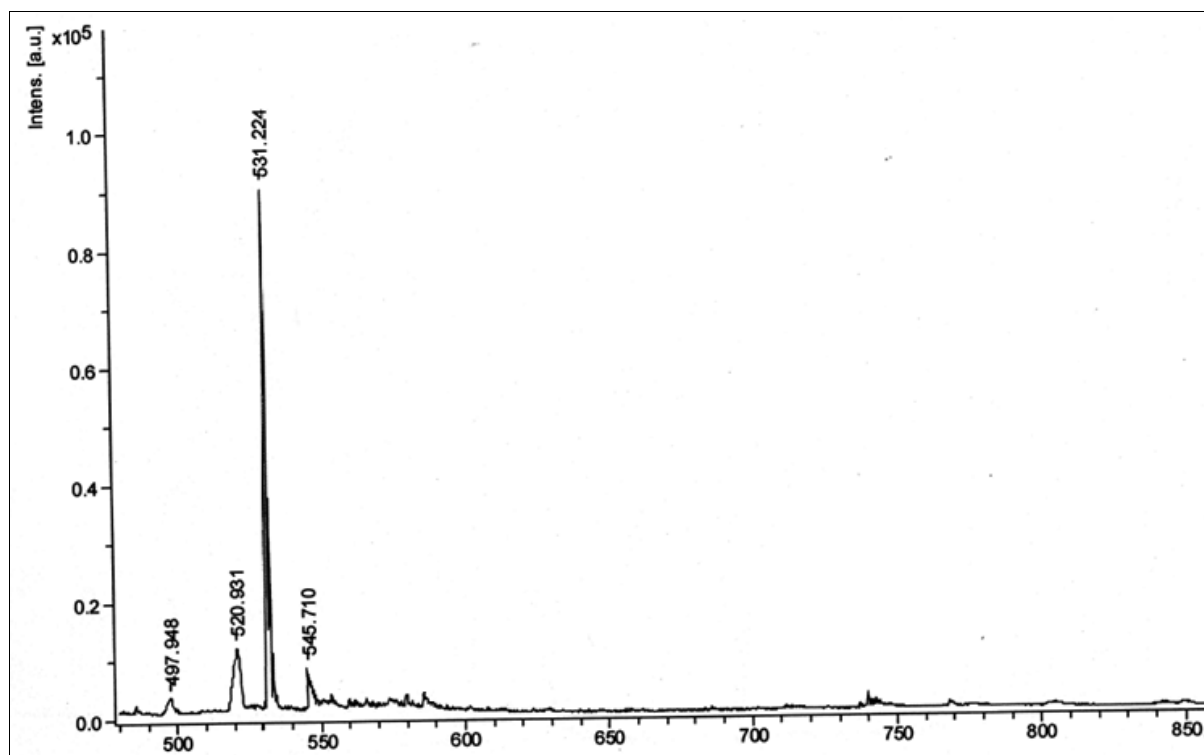

**Figure 17S.** MALDI-mass (+ve) spectrum of compound **L4** at 298K.

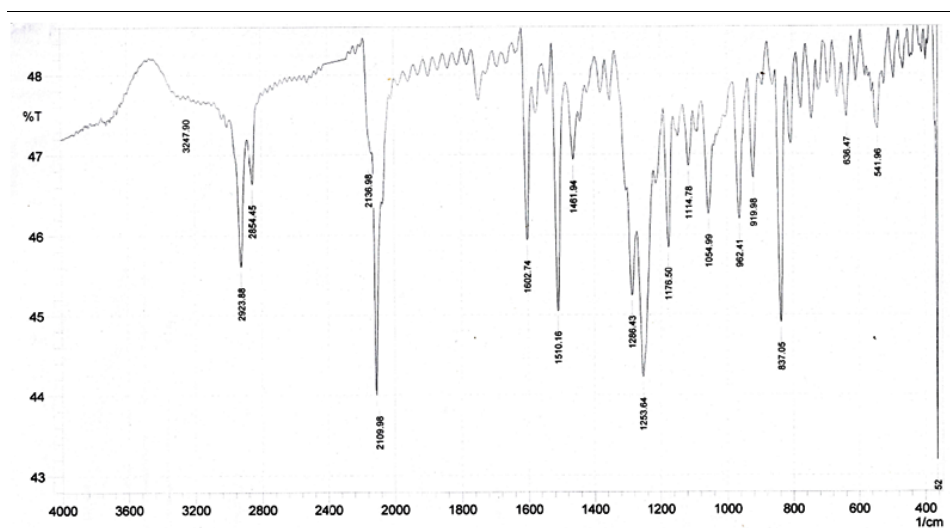

Figure 18S. IR spectrum of compound L4.

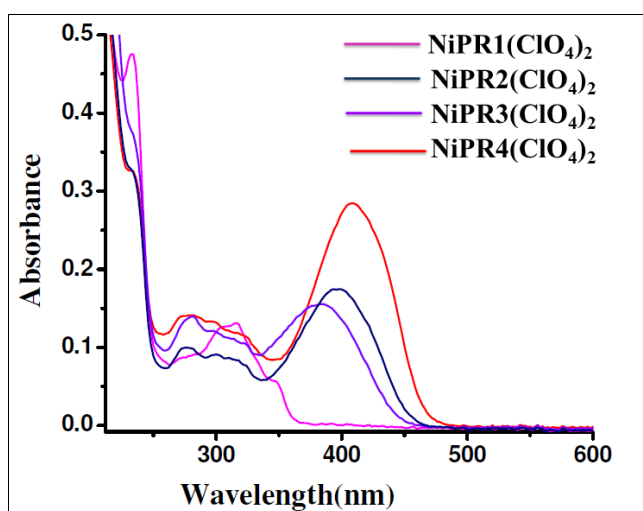

Figure 19S. Characteristic UV/Vis spectra of ternary complexes  $\{\text{NiPR1}(\text{ClO}_4)_2\text{-NiPR4}(\text{ClO}_4)_2\}$  in  $\text{CH}_3\text{CN}$  at 298K.

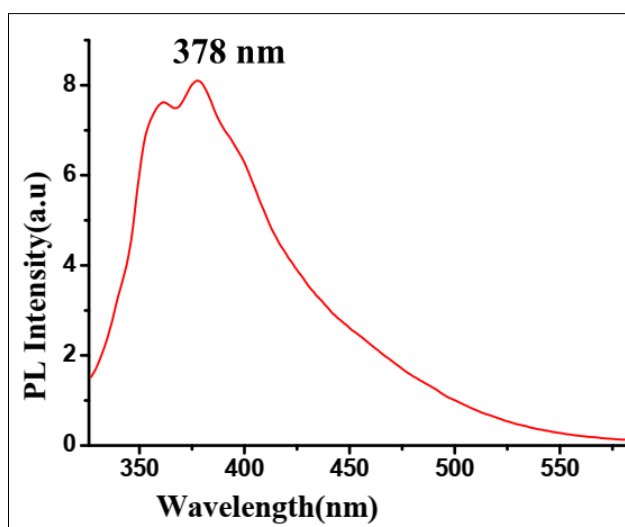

Figure 20S. Emission spectrum of  $\text{NiPR1}(\text{ClO}_4)_2$  in  $\text{CH}_3\text{CN}$  at 298K ( $\lambda_{\text{exc}} = 317 \text{ nm}$ ).

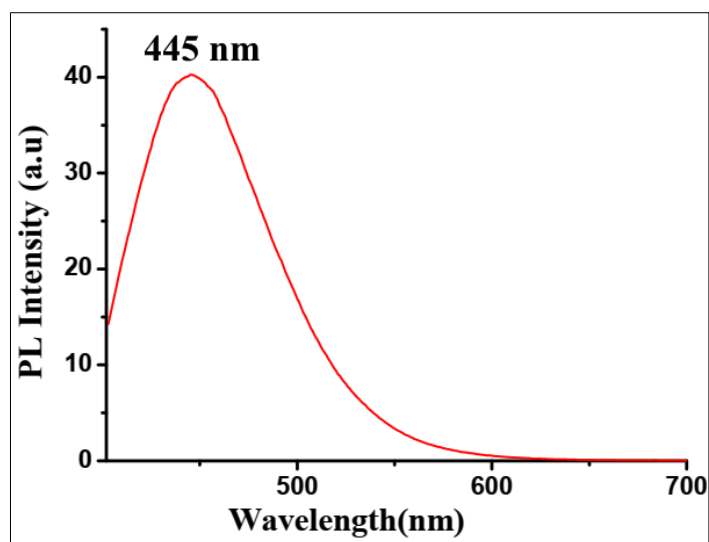

Figure 21S. Emission spectrum of NiPR2(ClO<sub>4</sub>)<sub>2</sub> in CH<sub>3</sub>CN at 298K ( $\lambda_{exc}$  = 396 nm).

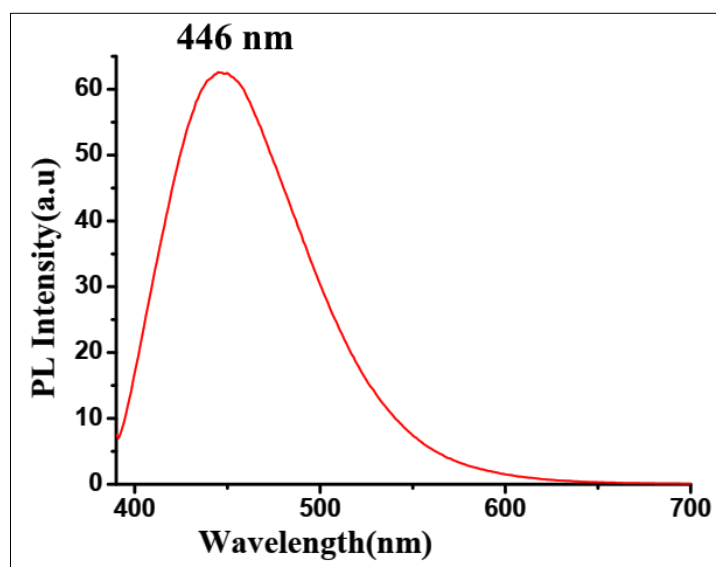

Figure 22S. Emission spectrum of NiPR3(ClO<sub>4</sub>)<sub>2</sub> in CH<sub>3</sub>CN at 298K ( $\lambda_{exc}$  = 385 nm).

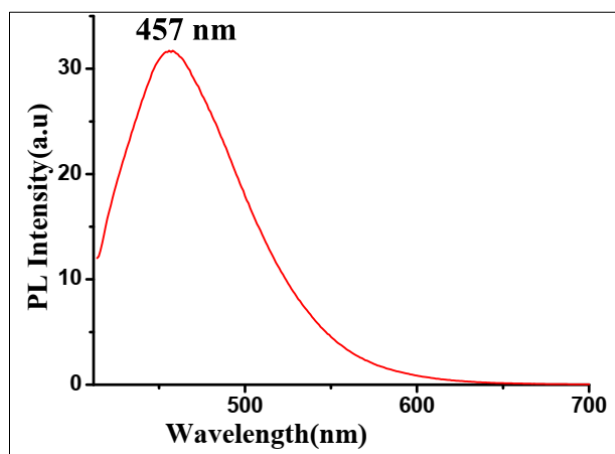

Figure 23S. Emission spectrum of NiPR4(ClO<sub>4</sub>)<sub>2</sub> in CH<sub>3</sub>CN at 298K ( $\lambda_{exc}$  = 408 nm).

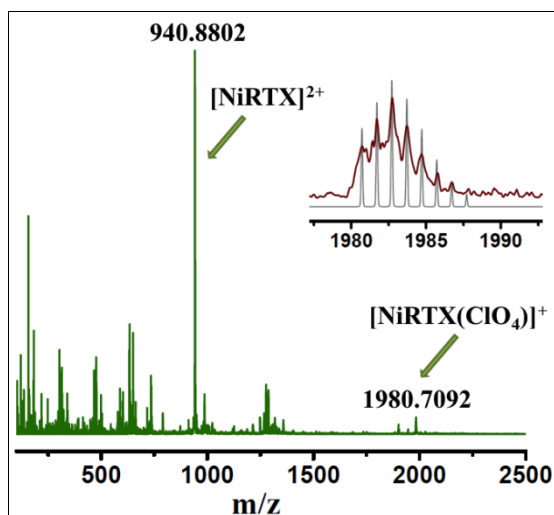

**Figure 24S.** ESI-MS (+ve) spectrum of Ni(II) templated rotaxane  $[\text{NiRTX}(\text{ClO}_4)_2]$  at 298K.

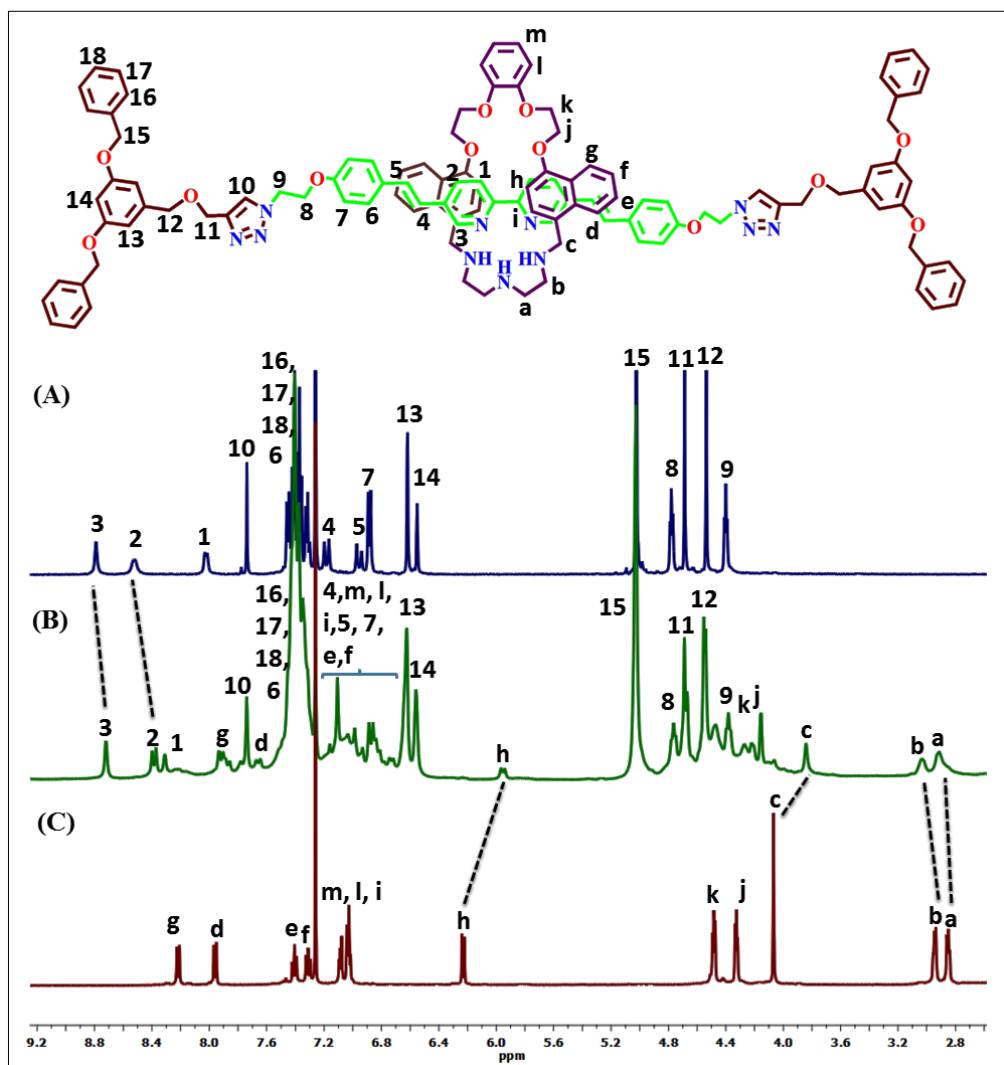

**Figure 25S.** Stacked  $^1\text{H}$  NMR spectra of (A) ConAx, (B) RTX, and (C) NaphMC in  $\text{CDCl}_3$  at 298 K. The labels of protons are shown correspond to NaphMC and ConAx in RTX in the above mentioned structure.

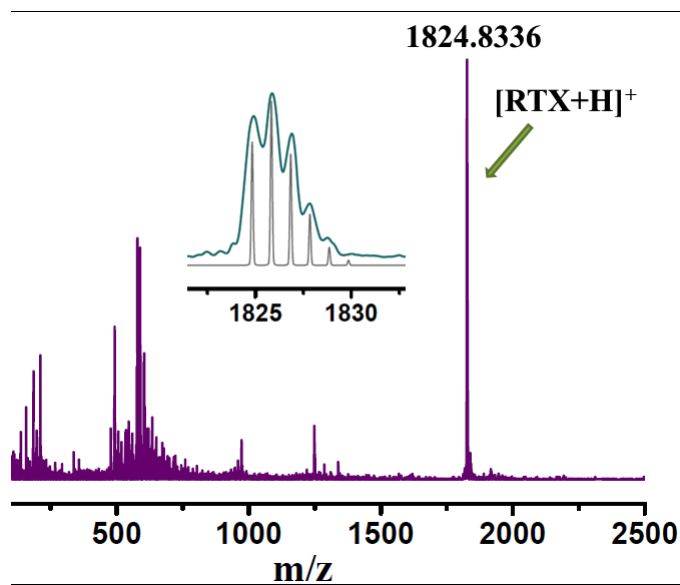

Figure 26S. ESI-MS (+ve) spectrum of metal free rotaxane [RTX] at 298K.

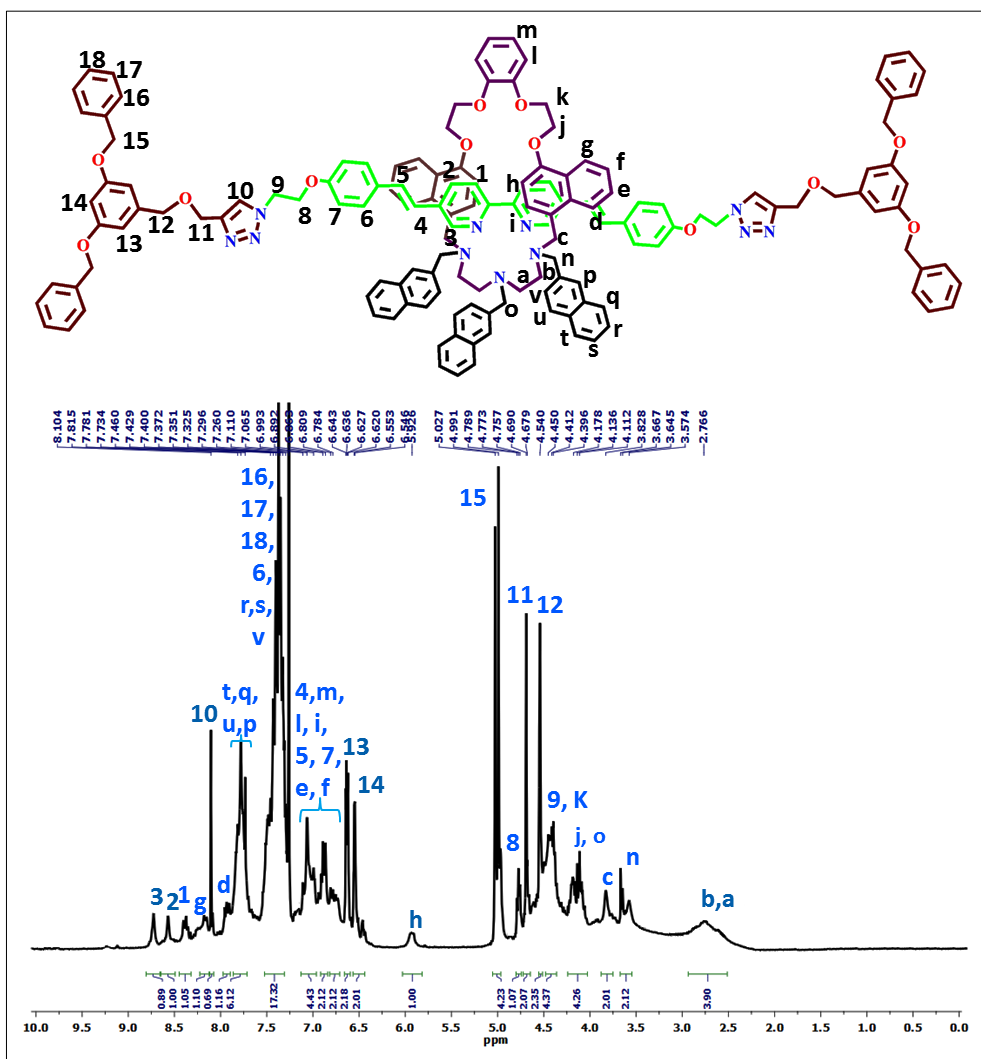

Figure 27S. <sup>1</sup>H-NMR spectrum of NAPRTX in CDCl<sub>3</sub> in 300 MHz at RT.

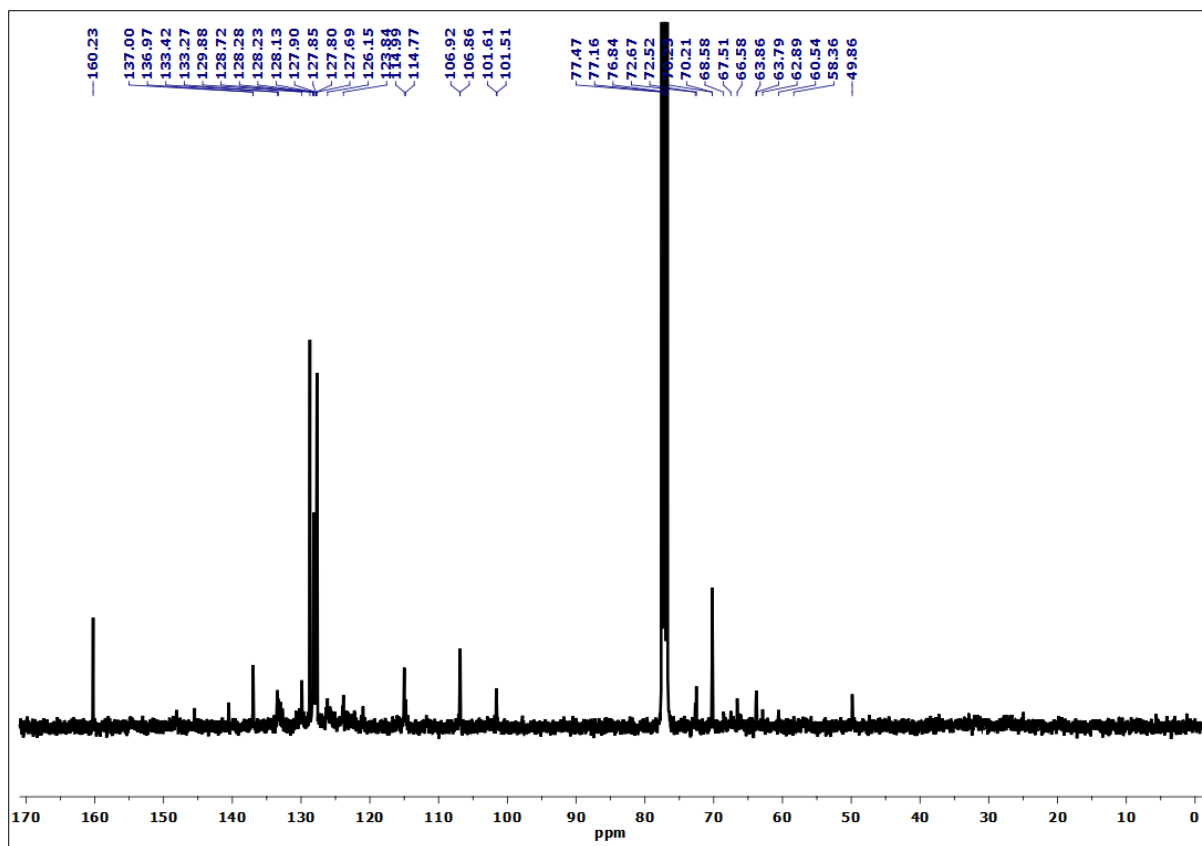

Figure 28S. <sup>13</sup>C-NMR spectrum of NAPRTX in CDCl<sub>3</sub> in 300 MHz at RT.

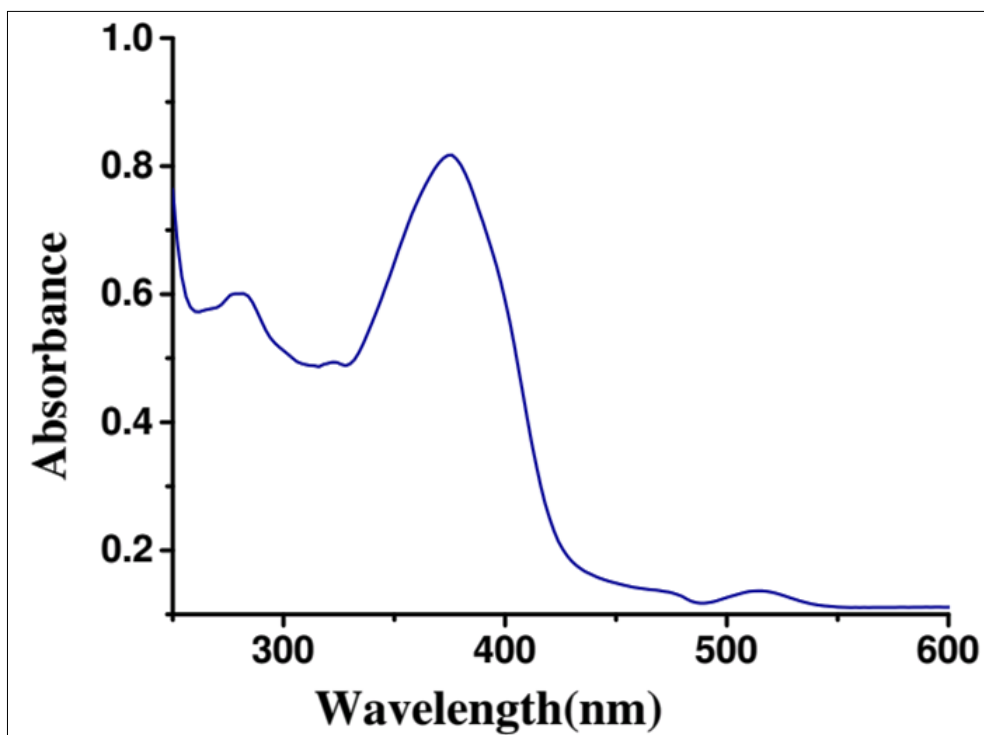

Figure 29S. UV/Vis spectrum of NAPRTX at 298K.



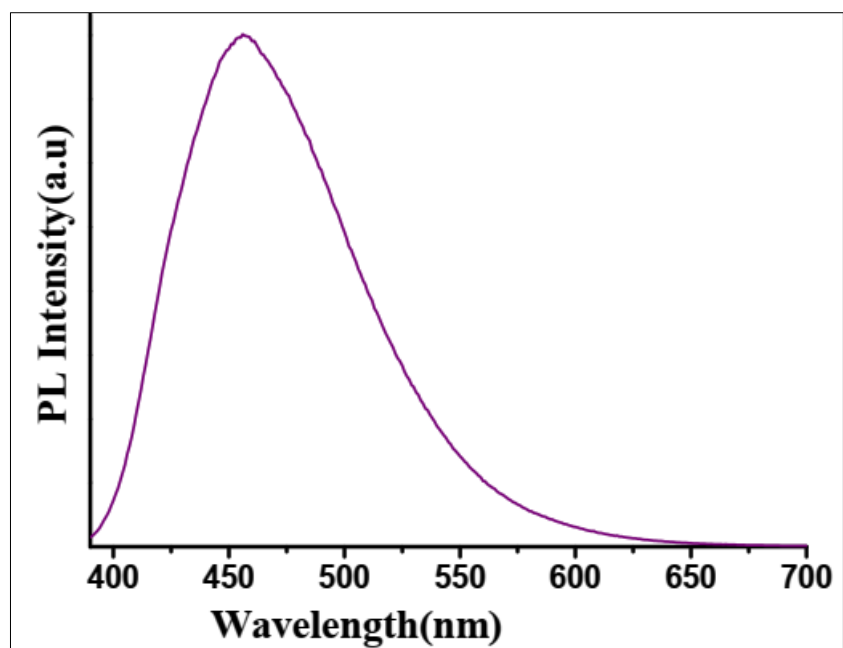

**Figure 30S.** Emission spectrum of NAPRTX exc at 375 nm at 298K.

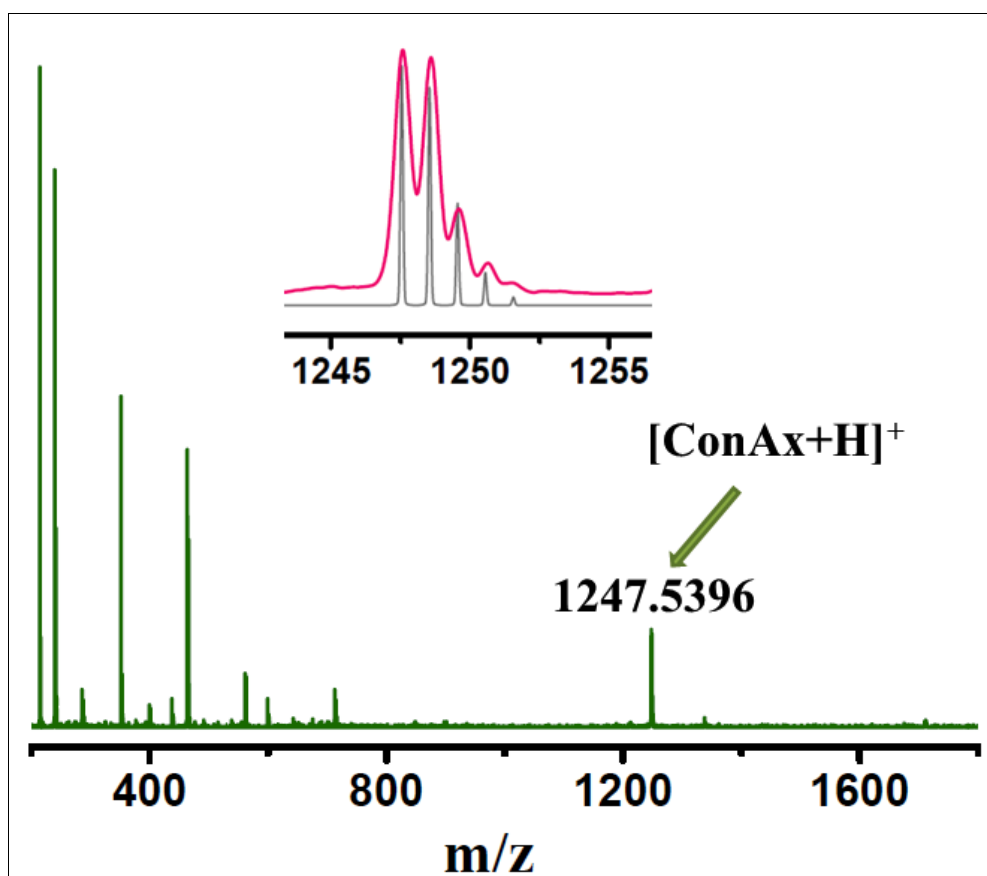

**Figure 31S.** ESI-MS (+ve) spectrum of ConAx at 298K.

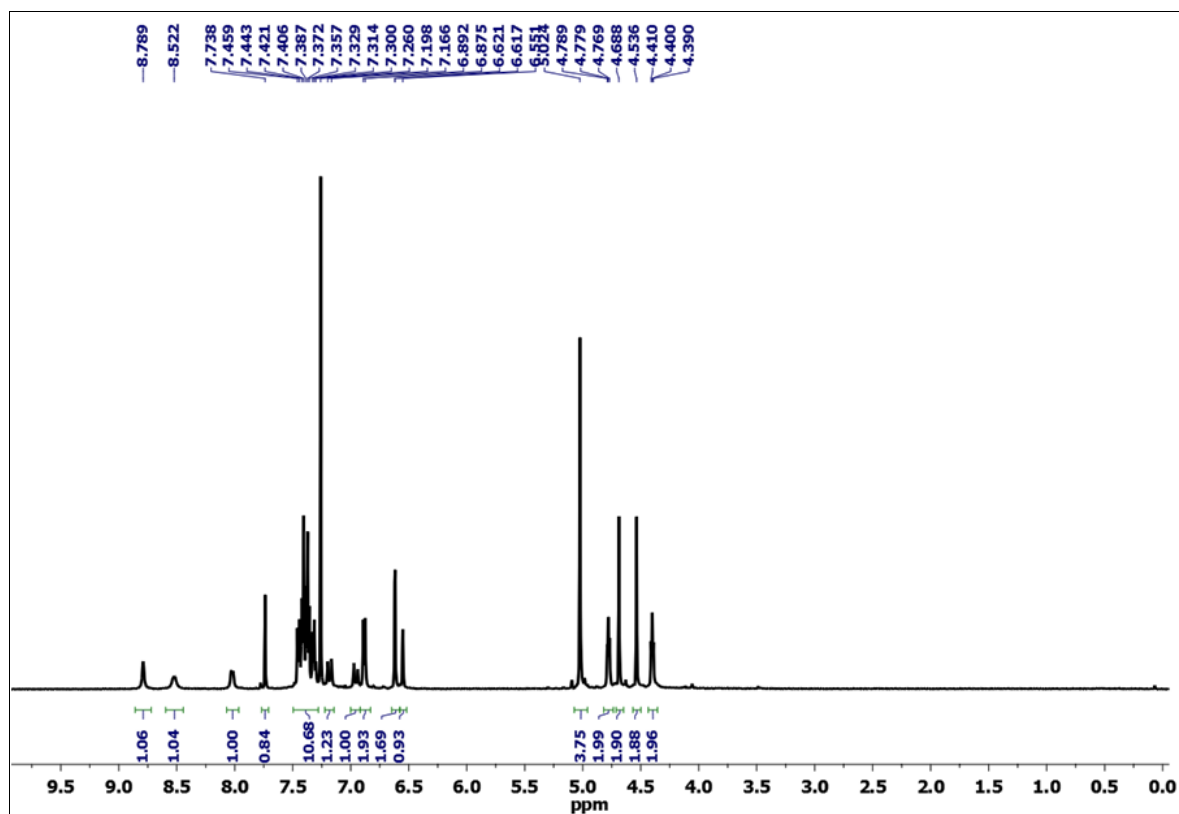

Figure 32S.  $^1\text{H}$ -NMR spectrum of **ConAx** in  $\text{CDCl}_3$  in 500 MHz at 298K.

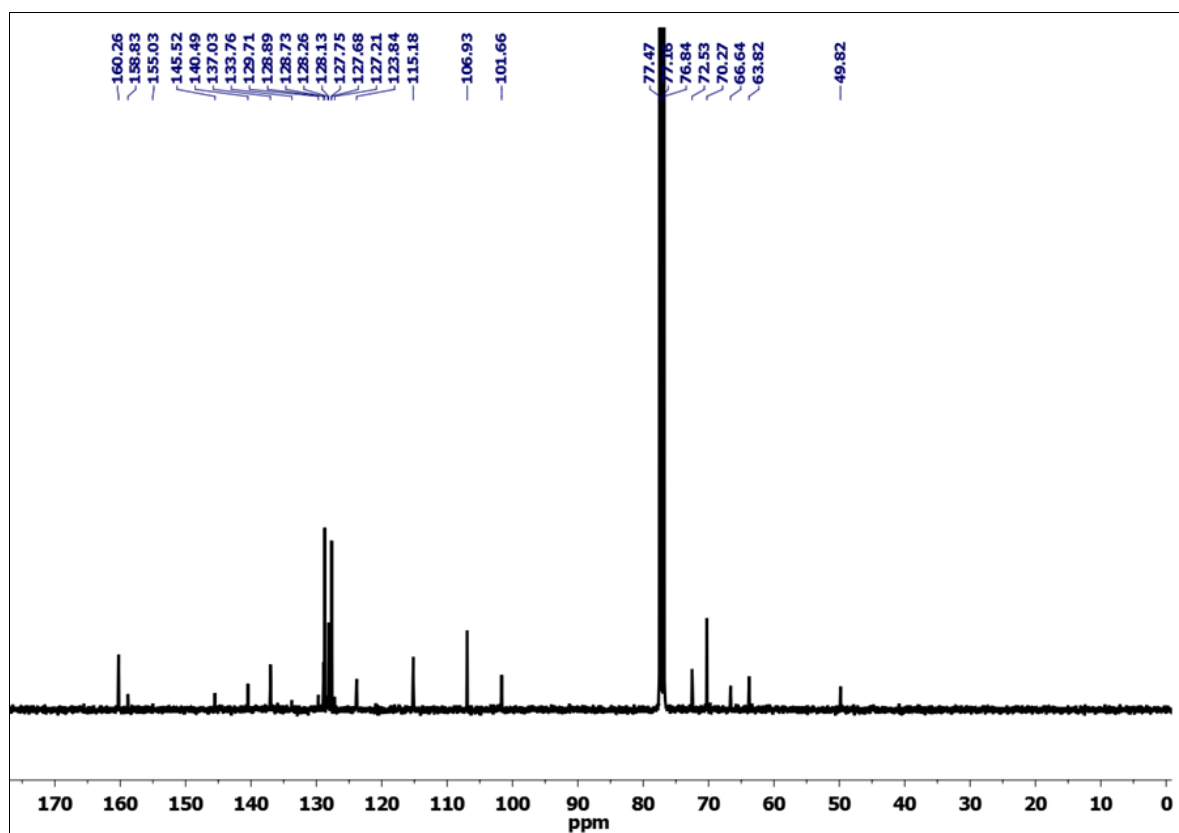

Figure 33S.  $^{13}\text{C}$ -NMR spectrum of **ConAx** in  $\text{CDCl}_3$  in 100 MHz at 298K.

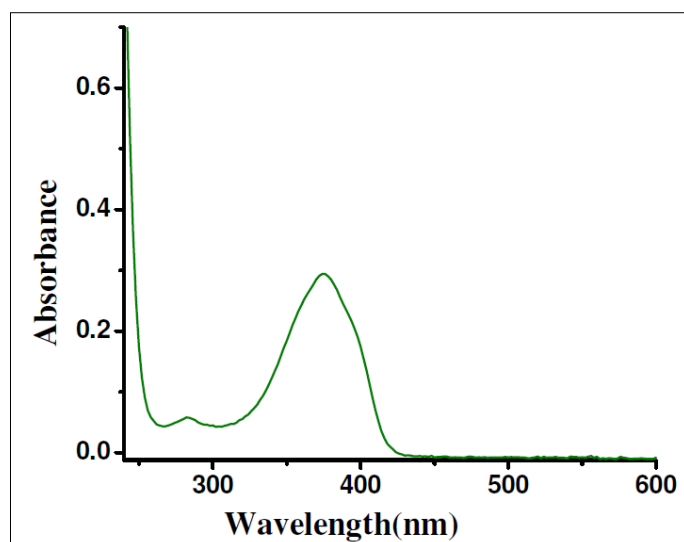

**Figure 34S.** UV/Vis spectrum of **ConAx** in DMF-CH<sub>3</sub>CN (2:8) at 298K.

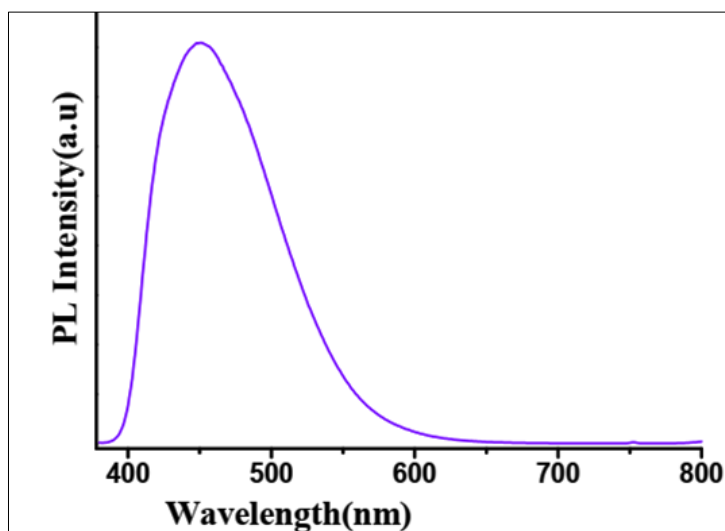

**Figure 35S.** Emission spectrum of **ConAx** ( $5 \times 10^{-6}$  M) in DMF-CH<sub>3</sub>CN (2:8) exc at 375 nm at 298K.

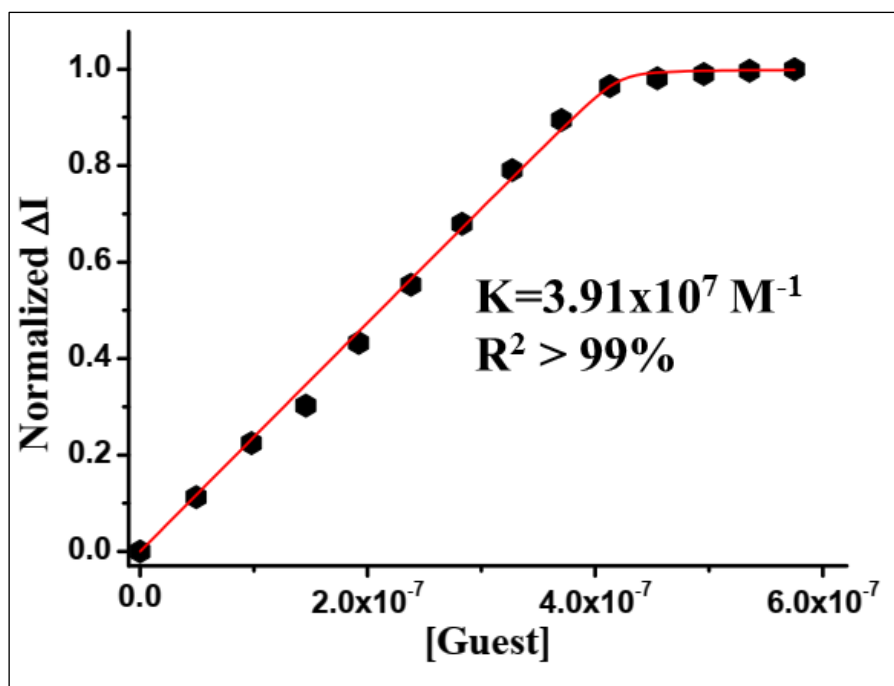

**Figure 36S.** Non-linear 1 : 1 curve fitting plot from PL titration data between NAPRTX and  $\text{Zn}^{2+}$  ion at 298 K,  $\lambda_{\text{exc}} = 375 \text{ nm}$ .

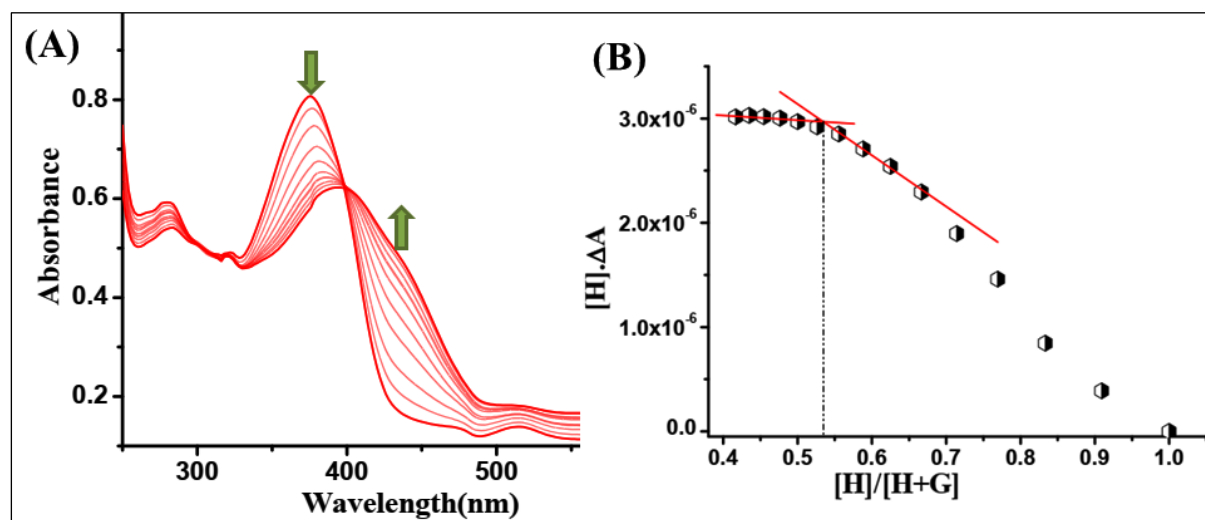

**Figure 37S.** (A) UV titration of NAPRTX with  $\text{Zn}(\text{ClO}_4)_2$  in solvent mixture {3% water in mixture of solvent} at 298 K. (B) Molar ratio plot.

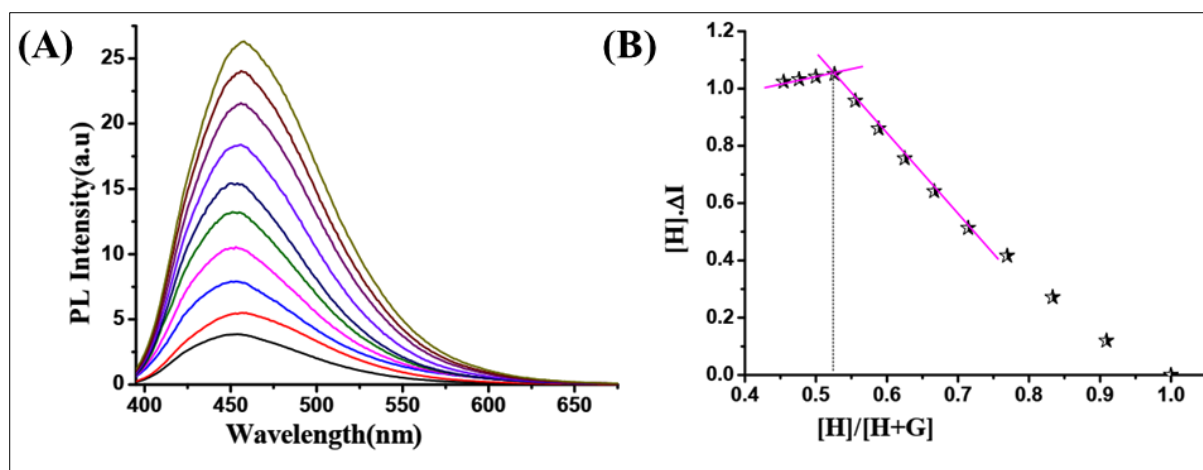

**Figure 38S.** (A) PL titration of NAPRTX with  $Zn(ClO_4)_2$  in solvent mixture {3% water in mixture of solvent} at 298 K. (B) Molar ratio plot.
